# Supplementary material for: A green approach for the production of biodiesel from fatty acids of corn deodorizer distillate
Source: Royal Society of Chemistry journal article supplement (doi:10.1039/c4ra08108k), 2014-01-01

## Supplementary File

### Figure Captions

Supplementary Figure 1. SEM images of the Sn-Alg beads: (a) high resolution (b) low resolution

Supplementary Figure 2. FFA conversion linearly increases with the increase in methanol to oil molar ratio (Figure 2a.); A range of catalyst concentration by changing the catalyst amount from 1% to 20% based on the mass of oleic acid (Figure 2b); The progress of FFA conversion with respect to the time (Figure 2c).

Fig.1

1(a)

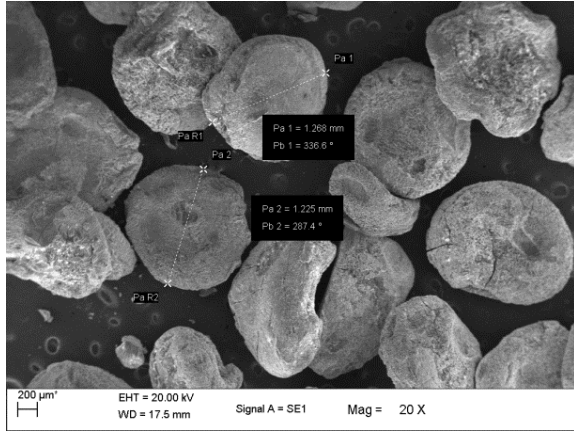

1 (b)

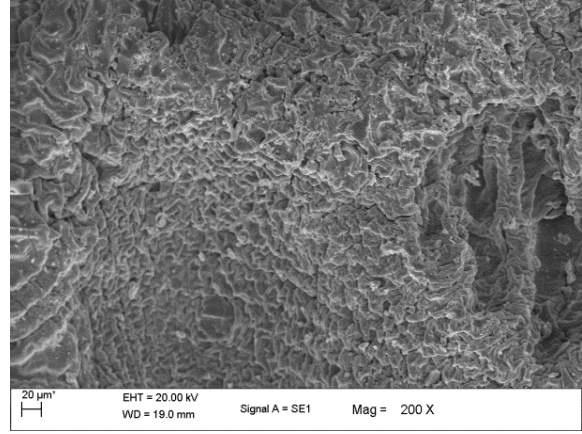

Supplementary Fig. 2.

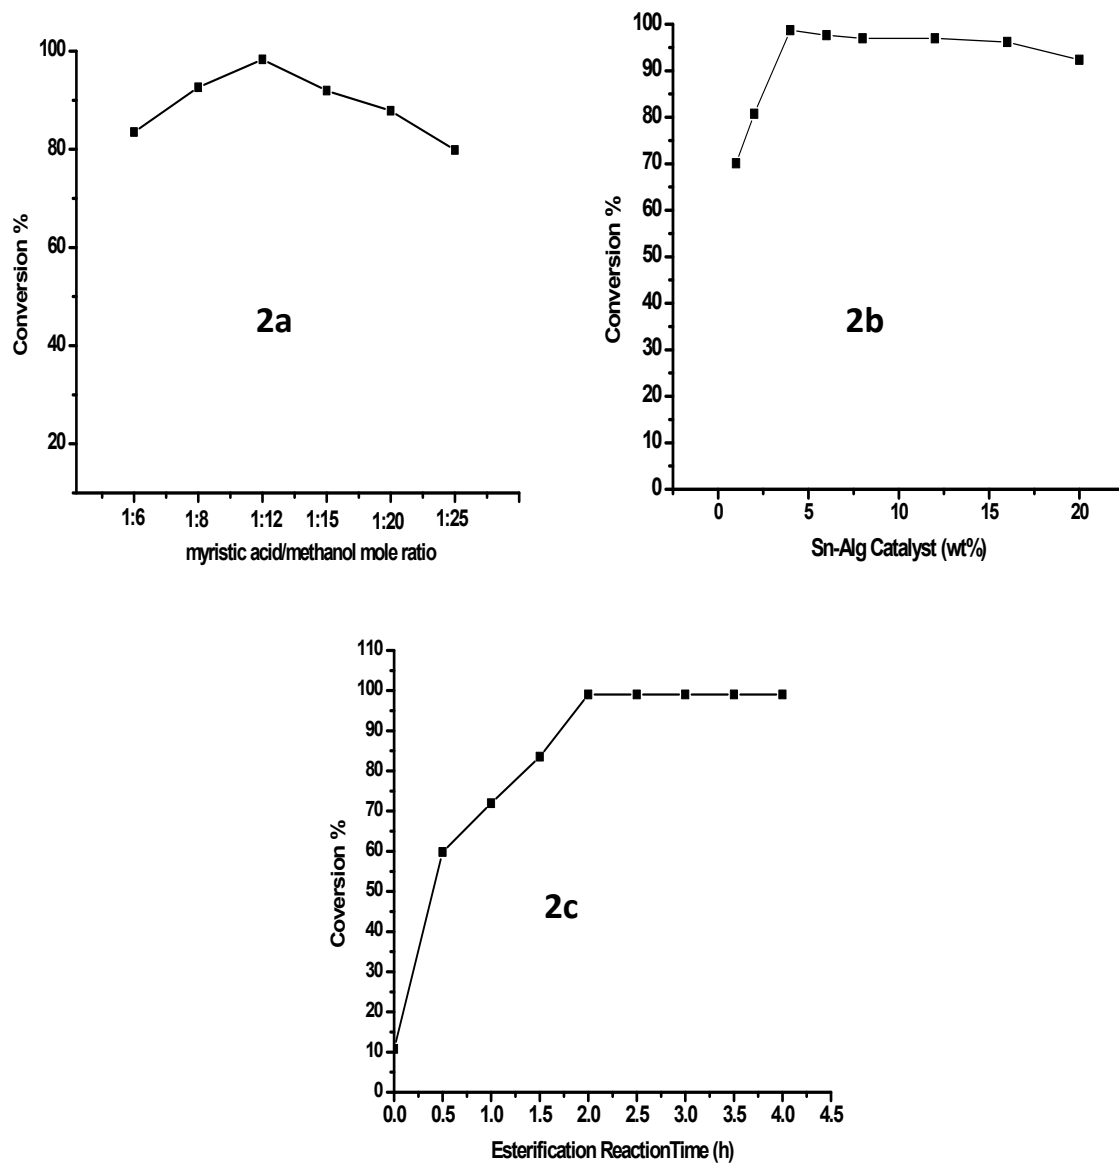

Supplement: c4ra08108k1.pdf [file c4ra08108k1.pdf]
